# Supplementary material for: In situ-created Mn(iii) complexes active for liquid-phase oxidation of alkylaromatics to aromatic ketones with molecular oxygen
Source: Royal Society of Chemistry journal article supplement (doi:10.1039/c5cy01308a), 2015-09-21
Supplement: c5cy01308a1.pdf [file c5cy01308a1.pdf]

## **Electronic Supplementary Information (ESI)**

### **In situ-created Mn(III) complex active for liquid-phase oxidation of alkylaromatics to aromatic ketones with molecular oxygen**

**Yasutaka Kuwahara,<sup>a,b</sup> Yukihiro Yoshimura<sup>a</sup> and Hiromi Yamashita<sup>a,b\*</sup>**

<sup>a</sup> Division of Materials and Manufacturing Science, Graduate School of Engineering, Osaka University, 2-1 Yamada-oka, Suita, Osaka 565-0871, Japan

<sup>b</sup> Unit of Elements Strategy Initiative for Catalysts & Batteries (ESICB), Kyoto University, Katsura, Kyoto 615-8520, Japan

\* Tel: (+81) 6-6879-7460, Fax: (+81) 6-6105-5029

E-mail: [yamashita@mat.eng.osaka-u.ac.jp](mailto:yamashita@mat.eng.osaka-u.ac.jp)

### **Preparation of Mn(PhCOO)<sub>2</sub><sup>+</sup> complex**

Mn(PhCOO)<sub>2</sub><sup>+</sup> complex was prepared as follows; a *N,N*-dimethylformamide (99.8%, Nacalai Tescue, Inc.) solution containing MnCl<sub>2</sub>·4H<sub>2</sub>O (98%, Nacalai Tescue, Inc.) and benzoic acid (99.5%, Nacalai Tescue, Inc.) with the molar ratio of 1:2 was magnetically stirred for 15 min, and then thermally reacted in the presence of O<sub>2</sub> at 135 °C for 12 h. The resulting solution was evaporated to remove the solvent and dried at 100 °C to yield Mn(PhCOO)<sub>2</sub><sup>+</sup> as a pale-red powder, which may containing Cl<sup>-</sup> as a counter anion.

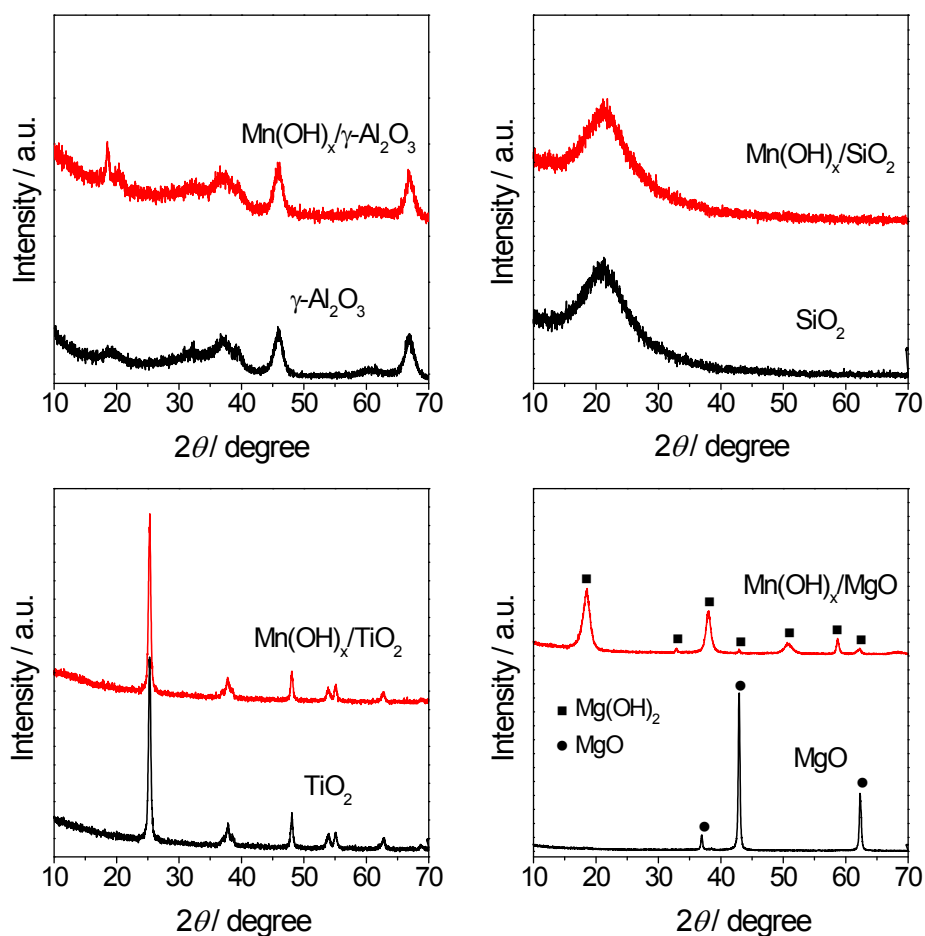

**Fig. S1** XRD patterns of bare oxide supports (black line) and freshly-prepared supported  $\text{Mn(OH)}_x$  catalysts (red line).  $\text{Mn(OH)}_x/\text{MgO}$  shows diffraction patterns assignable to  $\text{Mg(OH)}_2$  due to the hydration of  $\text{MgO}$  during the catalyst preparation.

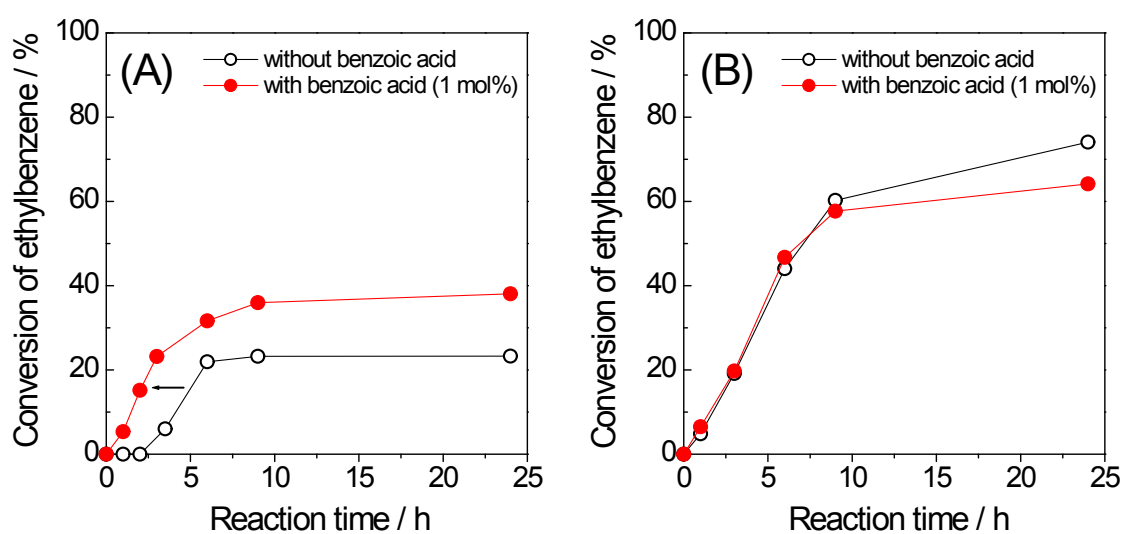

**Fig. S2** Comparison of conversions of ethylbenzene over (A)  $\text{Mn(OH)}_x/\text{TiO}_2$  and (B)  $\text{Mn(OH)}_x/\text{SiO}_2$  with and without addition of 1 mol% of benzoic acid.

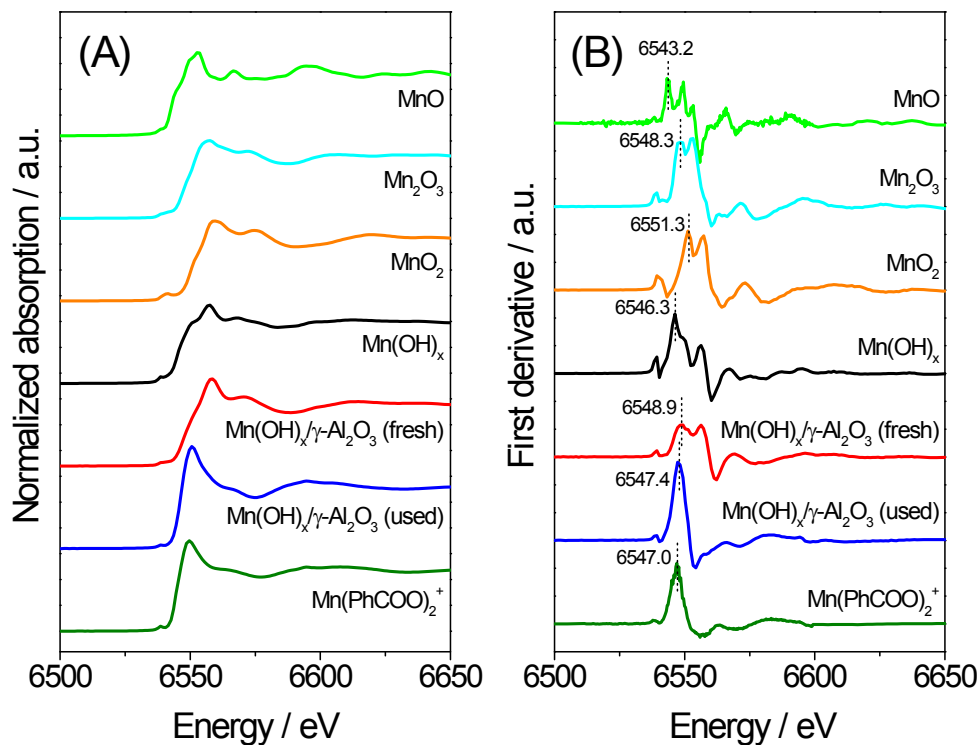

**Fig. S3** (A) Mn K-edge XANES spectra and (B) their first derivatives of  $\text{Mn(OH)}_x$ , fresh  $\text{Mn(OH)}_x/\gamma\text{-Al}_2\text{O}_3$ , used  $\text{Mn(OH)}_x/\gamma\text{-Al}_2\text{O}_3$ , and  $\text{Mn(PhCOO)}_2^+$  together with some reference Mn model compounds.

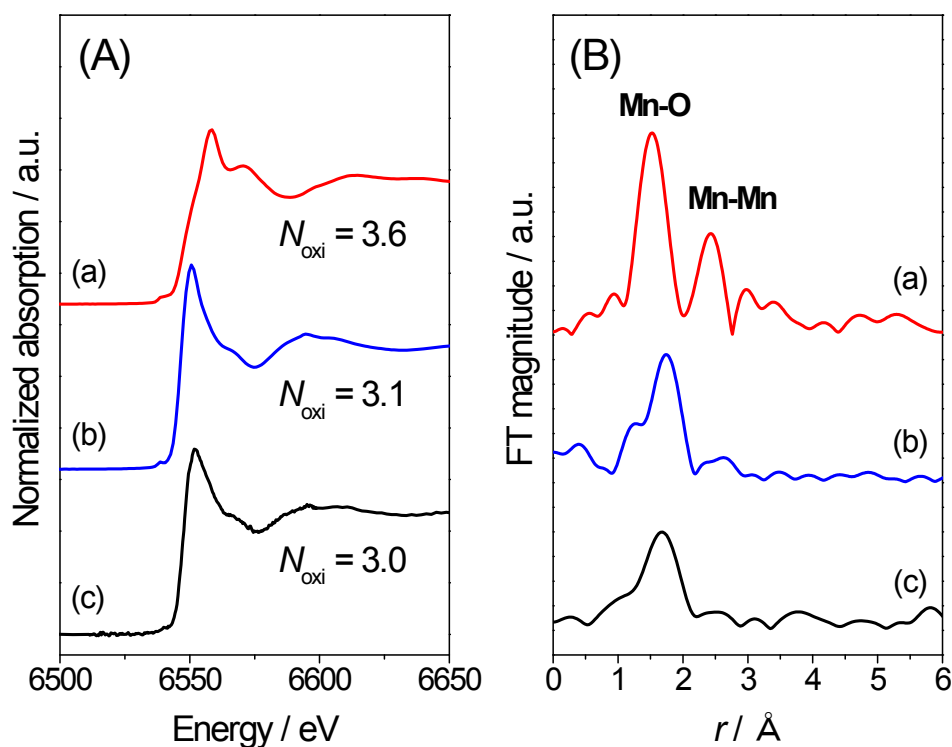

**Fig. S4** Mn K-edge radial distribution functions of  $\text{Mn(OH)}_x/\gamma\text{-Al}_2\text{O}_3$  catalyst (a) freshly prepared, (b) after 1st catalytic use, and (c) after 2nd catalytic use.
